# Supplementary material for: Lead analysis in paints for high impact control in homes
Source: Royal Society of Chemistry journal article supplement (doi:10.1039/c9ay01262a), 2019-01-01
Supplement: c9ay01262a1.pdf [file c9ay01262a1.pdf]

**Lead electroanalysis in paints for high impact control in homes**

**Electronic Supplementary Information (ESI)**

Andrés Ansín,<sup>a</sup> Giovanni Galletta,<sup>b</sup> Santiago Botasini<sup>a</sup> and Eduardo Méndez.\*<sup>a</sup>

<sup>a</sup> Laboratorio de Biomateriales, Instituto de Química Biológica, Facultad de Ciencias, Universidad de la República.  
Iguá 4225, 11400 Montevideo, Uruguay.

<sup>b</sup> Unidad de Tecnología de Alimentos. Facultad de Agronomía, Universidad de la República. 12900 Montevideo,  
Uruguay.

|                                                                                                     |    |
|-----------------------------------------------------------------------------------------------------|----|
| S1. World status on legally binding controls on lead paint .....                                    | 2  |
| S2. Solubility of some lead compounds .....                                                         | 4  |
| S3. Implementation of the Dust Wipe Method (DWM) .....                                              | 5  |
| S4. Derivation of equation (1) .....                                                                | 6  |
| S5. On-site activities .....                                                                        | 7  |
| S6. Analytical calibration plot in the absence of matrix effects .....                              | 8  |
| S7. Analytical calibration plot in the presence of Pb-free CRM (assessment of matrix effects) ..... | 10 |
| S8. Analytical calibration plot in the presence of Pb-CRM (recovery assay) .....                    | 12 |
| S9. SWASV and FTIR analyses of paint chip samples.....                                              | 13 |
| S9.1. Details of Case I .....                                                                       | 13 |
| S9.2. Details of Case II .....                                                                      | 15 |
| S9.3. Details of Case III .....                                                                     | 17 |

## S1. World status on legally binding controls on lead paint

The following text is from "Update on the global status of legal limits on lead in paint, September 2018", United Nations Environment Programme (2018):

As of 30 September 2018, 71 countries have legally binding controls to limit the production, import and sale of lead paints, which is 36.8% of all countries.

As of 30 September, 2018, 71 countries had confirmed that they have legally binding controls on lead in paint, 78 stated that they do not, and information was unavailable for the remaining 44 countries

Countries that have enacted laws to limit the lead content in paint have generally used one of two approaches:

(1) establish a single regulatory limit on the total concentration of lead in paint from all sources (currently used in 31 countries) or

(2) establish a set of chemical-specific regulatory limits based on the management of risks of individual lead compounds that are used as additives in paint (currently used in the EU's Registration, Evaluation, Authorisation and Restriction of Chemical (REACH) regulation).

### Legal Approach 1: Regulatory Limits on Total Lead Concentration

Of the 71 countries with lead paint laws, 33 countries have established a single regulatory limit on the total or soluble lead concentration in paint (in parts per million). These existing lead limits range from 90 ppm to 1,000 ppm or higher. Twenty-seven countries have a limit of 90, 100 or 600 ppm, which are all relatively low levels and indicate that lead compounds have probably not been added to the paint. Among countries with low limits, only one country uses a regulatory limit on soluble lead content, which is somewhat less protective than a limit on total lead content. There may be additional countries that also currently use a regulatory limit on soluble rather than total lead.

### Legal Approach 2: Chemical-Specific Regulatory Limits

Chemical-specific regulatory limits are used by 38 countries, of which 31 have adopted the EU REACH regulation on lead compounds in paints. EU REACH restricts the addition of certain specific lead compounds to paints intended for supply to the general public, based on risk management assessments. Some specific lead compounds for use in paints are subject to an authorization procedure for manufacturers and importers that requires analyses of health and environmental risks and the availability of non-lead alternatives.

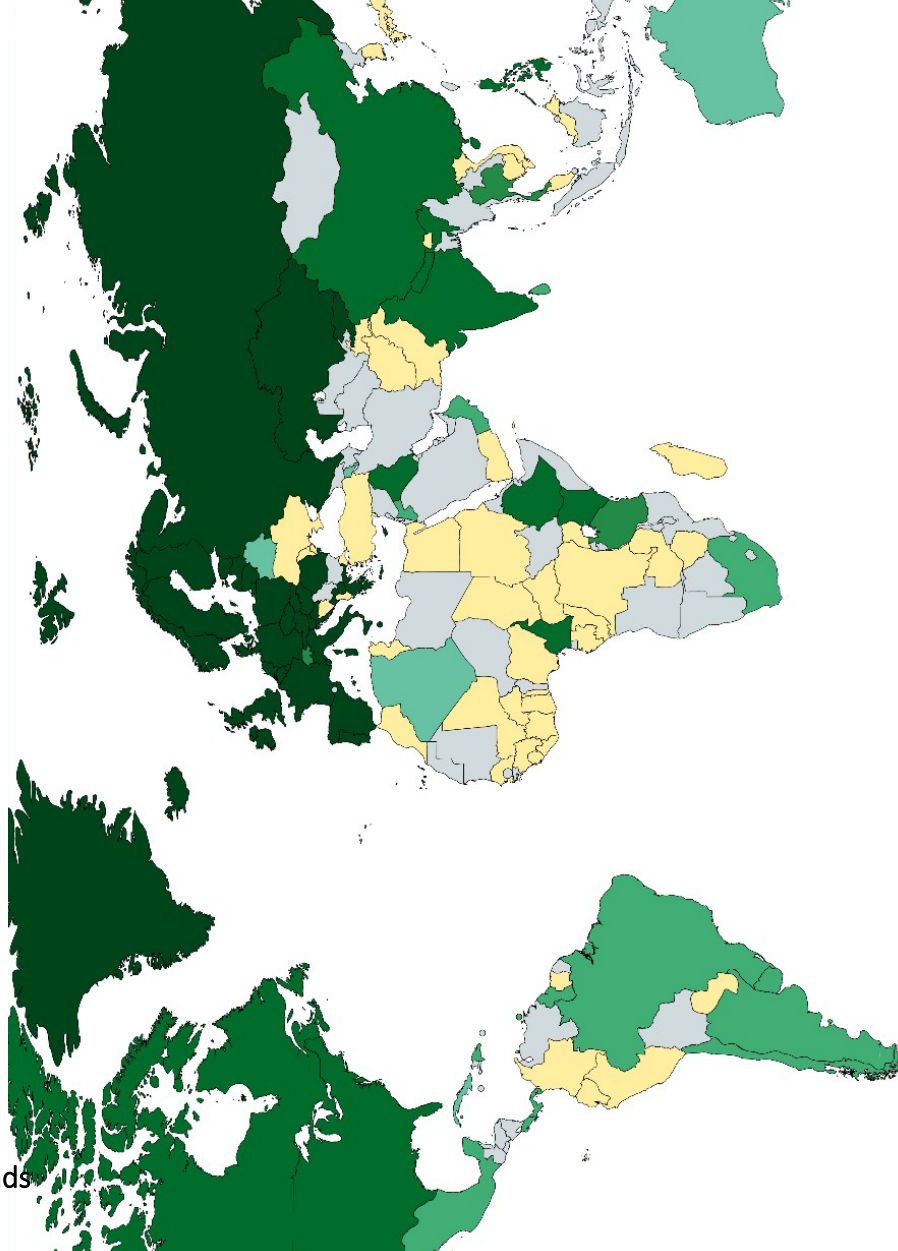

## S2. Solubility of some lead compounds

| Lead compound   | Formula                      | Molar mass (g/mol) | Solubility in water (g/L) | Solubility in acid and base                                                                   |
|-----------------|------------------------------|--------------------|---------------------------|-----------------------------------------------------------------------------------------------|
| Lead carbonate  | $\text{PbCO}_3$              | 267.2              | insoluble                 | Acids and bases                                                                               |
| Lead chromate   | $\text{PbCrO}_4$             | 323.2              | insoluble                 | $\text{HNO}_3$ dil. and bases                                                                 |
| Lead hydroxyde  | $\text{Pb(OH)}_2$            | 241.2              | 0.016                     | Acids and bases                                                                               |
| Lead (II) oxide | $\text{PbO}$                 | 223.2              | 0.0017                    | $\text{HNO}_3$                                                                                |
| Lead (IV) oxide | $\text{PbO}_2$               | 239.2              | insoluble                 | $\text{HCl}$ , $\text{HNO}_3$ dil + $\text{H}_2\text{O}_2$ , $\text{H}_2\text{C}_2\text{O}_4$ |
| Lead phosphate  | $\text{Pb}_3(\text{PO}_4)_2$ | 811.5              | insoluble                 | $\text{HNO}_3$ and bases                                                                      |
| Lead sulphate   | $\text{PbSO}_4$              | 303.3              | 0.00425                   | $\text{NaOH}$                                                                                 |
| Lead sulphide   | $\text{PbS}$                 | 293.3              | 0.0006                    | Hot $\text{HCl}$ dil                                                                          |

>1000 ppm  
No low

### S3. Implementation of the Dust Wipe Method (DWM)

The limit of detection (LOD) for the Dust Wipe Method described in NIOSH Method #9105 is between 5 – 10  $\mu\text{g}$ . According to Feigel, the LOD for the drop spot test is between 5 – 15  $\mu\text{g}$ . Known interferences for this test are  $\text{Ti(II)}$ ,  $\text{Ag(I)}$ ,  $\text{Cd(II)}$ ,  $\text{Ba(II)}$  and  $\text{Sn(II)}$ , which also form coloured compounds with the rhodizonate ion, but with less sensitivity than  $\text{Pb(II)}$ . Also,  $\text{Pb(II)}$  is the only ion that gives the characteristic pink or red colour.

As other components present in the wipe medium (e.g. surfactants) could interfere, the limit of detection was checked with the commercial wet wipes employed.

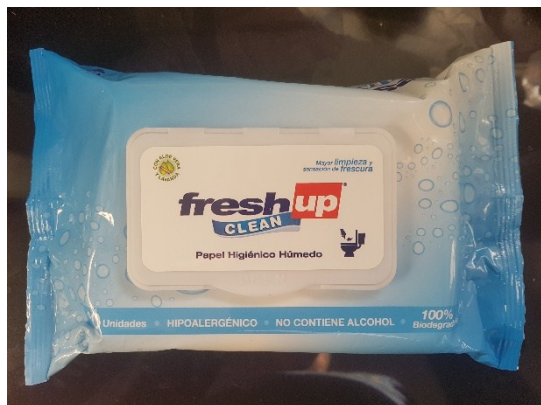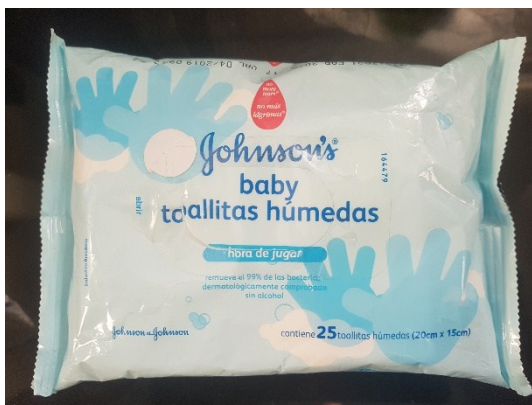

Wet wipes used are originally commercialised for toilette paper (left) or for baby cleaning (right). Pictures taken by E. Méndez.

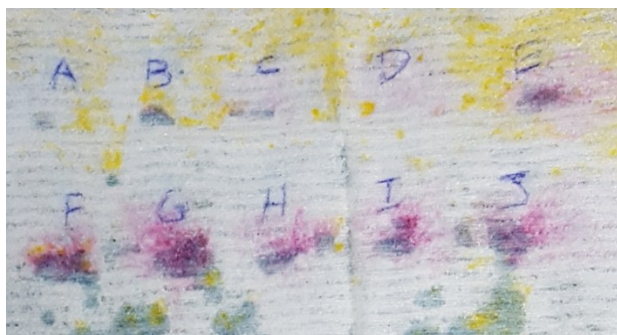

Amount of Pb in each spot (in  $\mu\text{g}$ ): A = 1, B = 2, C = 5, D = 7, E = 10, F = 20, G = 40, H = 60, I = 80, and J = 100. Picture taken by A. Ansín.

The assay was carried out by triplicate, by addition of the same volume of  $\text{Pb(II)}$  containing solutions in the range 1 - 100  $\mu\text{g}$ . The spot with the lower Pb concentration giving clearly positive is considered as “positive”. In the Figure, it corresponds to spot “E”, with 10  $\mu\text{g}$ . Notice that C and D still gave a positive output, but could not be conclusive in on-site operations. In these cases, these results are considered “suspicious”.

The size of the spots are *ca.* 10  $\text{cm}^2$ , meaning that the LOD is *ca.* 1  $\mu\text{g}/\text{cm}^2$  for a positive result, and 0.5  $\mu\text{g}/\text{cm}^2$  for a suspicious result.

How these values relate to the Pb content in the paint is still a matter of controversy, but as a reference, the limits established in some norms indicate that the Pb content in paints should not exceed 0.1  $\text{mg}/\text{cm}^2$  or 600  $\text{mg}/\text{kg}$ . If the proportion continues, the equivalence would be 90  $\text{mg}/\text{kg}$  to 15  $\mu\text{g}/\text{cm}^2$ . Hence, the DWM is adequate as a screening on-site method for Pb in paints.

#### References

Feigel, A.V. Spot Tests in Inorganic Analysis. (1972). Elsevier (Amsterdam), pp. 282-287, 564-566, 569

## S4. Derivation of equation (1)

The complete protocol for the determination of the Pb content in paint chips involve the following steps:

| Step | Procedure                                                        | Parameter involved (units)  | Value or Range | Can be varied?                                                                             |
|------|------------------------------------------------------------------|-----------------------------|----------------|--------------------------------------------------------------------------------------------|
| 1.   | Weight a sample of paint chips                                   | $m_{\text{sample}}$ (g)     | 0.050 – 0.400  | YES, in the range specified by the NIOSH Method 7701                                       |
| 2.   | Digestion to a final volume                                      | $V_{\text{digestion}}$ (mL) | 50             | NO. Official technique NIOSH Method 7701.                                                  |
| 3.   | Take an aliquote of the digestion                                | $V_{\text{aliquote}}$ (μL)  | 100 - 500      | YES, in a limited range, while the Pb normalized current is within the 0 – 100 μg/L range. |
| 4.   | Dilute sample $1/f$ ( $f$ = dilution factor) for high Pb content | $f$                         | as needed      | YES, in order that the Pb normalized current is within the 0 – 100 μg/L range.             |
| 5.   | Add buffer to the electrochemical cell to a final volume         | $V_{\text{cell}}$ (mL)      | 10             | NO, is the final volume for which the present electrochemical technique was validated.     |

Let's consider a sample with a Pb content of " $Pb_{\text{sample}}$ " (mg Pb/kg sample). The Pb content in each step summarized in the Table above are:

$$\text{Step 1.} \quad Pb \text{ (in mg)} = \frac{Pb_{\text{sample}} m_{\text{sample}}}{1000}$$

$$\text{Step 2.} \quad Pb \text{ (in mg/mL)} = \frac{Pb_{\text{sample}} m_{\text{sample}}}{1000 V_{\text{digestion}}}$$

$$\text{Step 3.} \quad Pb \text{ (in mg)} = \frac{Pb_{\text{sample}} m_{\text{sample}} V_{\text{aliquote}}}{(1000)^2 V_{\text{digestion}}}$$

$$\text{Step 4.} \quad Pb \text{ (in mg)} = \frac{Pb_{\text{sample}} m_{\text{sample}} V_{\text{aliquote}}}{(1000)^2 V_{\text{digestion}} f}$$

$$\text{Step 5.} \quad Pb_{\text{solution}} \text{ (in } \mu\text{g/L)} = \frac{Pb_{\text{sample}} m_{\text{sample}} V_{\text{aliquote}}}{V_{\text{digestion}} f V_{\text{cell}}}$$

In this equation,  $V_{\text{cell}} = 10 \text{ mL}$  and  $V_{\text{digestion}} = 50 \text{ mL}$  cannot be changed. Hence, the equation for the calculation of  $Pb_{\text{sample}}$  (in mg/kg) is:

$$Pb_{\text{sample}}(\text{mg/kg}) = \frac{500 (\text{mL}^2) f Pb_{\text{solution}} (\mu\text{g/L})}{m_{\text{sample}}(\text{g}) V_{\text{aliquote}}(\mu\text{L})}$$

## S5. On-site activities

Most of the measurements were carried out at homes within the neighbourhoods in Montevideo and Canelones (Uruguay). The homes at these neighbourhoods are constructed with basic materials. Inhabitants are not involved in waste recycling as a way of living. In the construction of their homes, old doors and windows, as well as some furniture, are used, mainly obtained as recycled materials from other houses, destroyed for the construction of new ones. Those pieces have been already painted, probably before the '80s, constituting one of the main Pb sources in-home. Other Pb source is the use of old paints that are recovered by the addition of suitable solvents.

The following pictures (taken by E. Méndez) illustrate the application of the Dust Wipe Method screening on-site by one of the authors (A. Ansín).

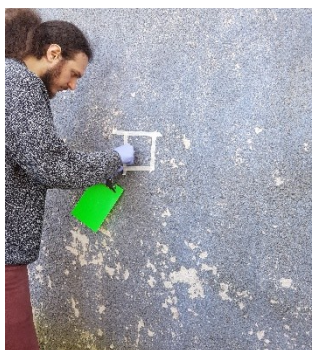

Delimitation of an approximate square of 100 cm<sup>2</sup> for the application of the Dust Wipe Method.

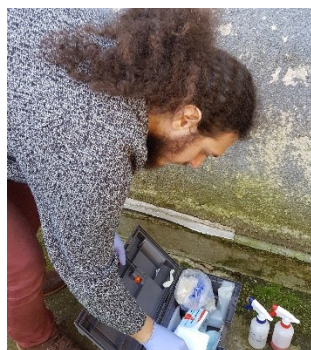

Carry-on kit containing all the elements for the application of the Dust Wipe Method.

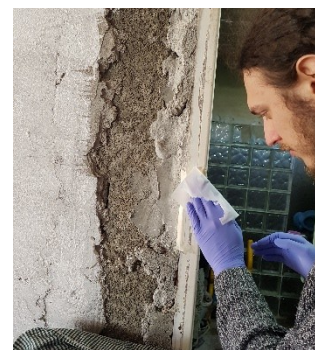

Scrapping a paint chip from an old recycled door employed in the construction of a new home.

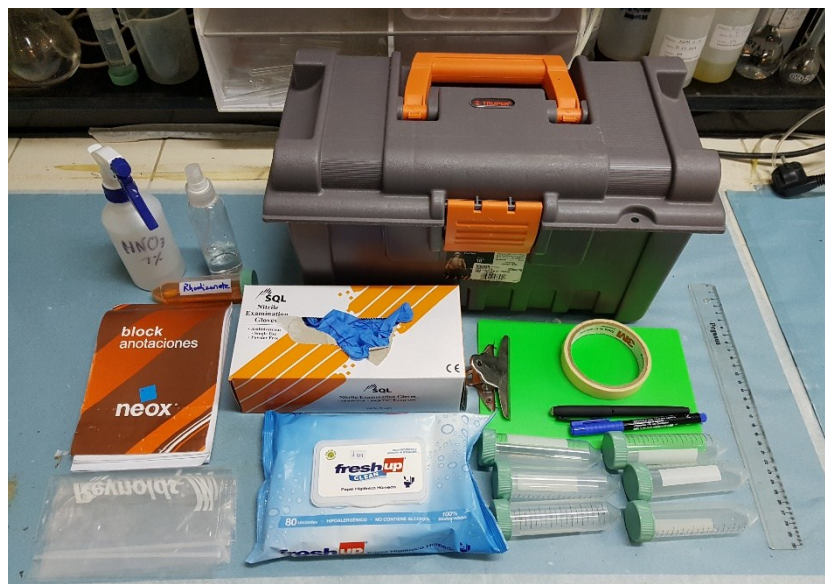

Kit content for the application of the Dust Wipe Method screening on-site

## S6. Analytical calibration plot in the absence of matrix effects



Linear and quadratic fits to the data yield the following parameters:

|                      | Value                 | Standard error        | t-value  | P >  t                | 95 % confidence range                               |
|----------------------|-----------------------|-----------------------|----------|-----------------------|-----------------------------------------------------|
| <u>Linear fit</u>    |                       |                       |          |                       |                                                     |
| Intercept            | -0.00577              | 0.00139               | -4.14075 | 3.45x10 <sup>-4</sup> | (-0.00863) – (-0.0029)                              |
| Slope                | 6.61x10 <sup>-4</sup> | 0.28x10 <sup>-4</sup> | 23.9888  |                       | (6.04x10 <sup>-4</sup> ) – (7.18x10 <sup>-4</sup> ) |
| <u>Quadratic fit</u> |                       |                       |          |                       |                                                     |
| Intercept            | -0.00103              | 0.00181               | -0.57208 | 0.57259               | (-0.00477) – (0.0027)                               |
| Linear term          | 3.32x10 <sup>-4</sup> | 0.99x10 <sup>-4</sup> | 3.35952  | 0.0026                | (1.28x10 <sup>-4</sup> ) – (5.36x10 <sup>-4</sup> ) |
| Quadratic term       | 3.23x10 <sup>-6</sup> | 0.94x10 <sup>-6</sup> | 3.4218   | 0.00223               | (1.28x10 <sup>-6</sup> ) – (5.18x10 <sup>-6</sup> ) |

For the linear fit, Student's test statistic reject the null hypothesis (intercept = 0) and hence, at 95 % confidence limit, the fitted intercept is significantly different from zero. Also, the confidence limit interval for the intercept does not include the zero value, reinforcing the idea of a non-zero intercept. In the case of the quadratic fit, Student's test statistic accept the null hypothesis, and therefore, at the 95 % confidence limit the intercept is NOT significantly different from zero.

These results suggest that the quadratic model should give a better fit to the data than the linear model. The ANOVA-LOF test, however, do not give significant evidence of lack of fit for both models at 95 % confidence limit.

|                      | DF | Sum of squares          | Mean square            | F value | Prob>F  |
|----------------------|----|-------------------------|------------------------|---------|---------|
| <u>Linear fit</u>    |    |                         |                        |         |         |
| Lack of fit          | 7  | 1.866x10 <sup>-4</sup>  | 2.666x10 <sup>-5</sup> | 1.47883 | 0.23663 |
| Pure error           | 18 | 3.2447x10 <sup>-4</sup> | 1.803x10 <sup>-5</sup> |         |         |
| Error                | 25 | 5.11x10 <sup>-4</sup>   |                        |         |         |
| <u>Quadratic fit</u> |    |                         |                        |         |         |
| Lack of fit          | 6  | 1.902x10 <sup>-5</sup>  | 3.171x10 <sup>-6</sup> | 0.1759  | 0.97996 |
| Pure error           | 18 | 3.245x10 <sup>-4</sup>  | 1.803x10 <sup>-5</sup> |         |         |
| Error                | 24 | 3.435x10 <sup>-4</sup>  |                        |         |         |

In view of these results, both models were compared, using different criteria, namely, Akaike's Information Criterion Test (AIC), Bayesian Information Criterion Test (BIC), and Mandel's test (F-test).

AIC Test



|                 | RSS                     | N  | Params | AIC        | Akaike Weight |
|-----------------|-------------------------|----|--------|------------|---------------|
| Linear model    | $5.1107 \times 10^{-4}$ | 27 | 2      | -286.57748 | 0.0184        |
| Quadratic model | $3.4349 \times 10^{-4}$ | 27 | 3      | -294.53097 | 0.9816        |

#### BIC Test

|                 | RSS                     | N  | Params | BIC        | Diff BIC |
|-----------------|-------------------------|----|--------|------------|----------|
| Linear model    | $5.1107 \times 10^{-4}$ | 27 | 2      | -283.73345 | 7.43235  |
| Quadratic model | $3.4349 \times 10^{-4}$ | 27 | 3      | -291.1658  | 0        |

#### F-test

| F        | Numer.DF | Denom.DF | Prob > F |
|----------|----------|----------|----------|
| 11.70869 | 1        | 24       | 0.00223  |

At 95 % confidence level, the 3 tests indicate that the quadratic model is more likely to be correct than the linear model.

## S7. Analytical calibration plot in the presence of Pb-free CRM (assessment of matrix effects)

Linear and quadratic fits to the data yield the following parameters:

|                      | Value                  | Standard error        | t-value  | P >  t                | 95 % confidence range                           |
|----------------------|------------------------|-----------------------|----------|-----------------------|-------------------------------------------------|
| <u>Linear fit</u>    |                        |                       |          |                       |                                                 |
| Intercept            | -0.00479               | $7.88 \times 10^{-4}$ | -6.08121 | $2.35 \times 10^{-6}$ | $(-0.00641) - (-0.00317)$                       |
| Slope                | $5.86 \times 10^{-4}$  | $0.16 \times 10^{-4}$ | 37.61669 |                       | $(5.54 \times 10^{-4}) - (6.18 \times 10^{-4})$ |
| <u>Quadratic fit</u> |                        |                       |          |                       |                                                 |
| Intercept            | $-8.38 \times 10^{-4}$ | $6.66 \times 10^{-4}$ | -1.25797 | 0.2205                | $(-0.00221) - (5.37 \times 10^{-4})$            |
| Linear term          | $3.12 \times 10^{-4}$  | $0.36 \times 10^{-4}$ | 8.55652  | $9.4 \times 10^{-9}$  | $(2.36 \times 10^{-4}) - (3.87 \times 10^{-4})$ |
| Quadratic term       | $2.70 \times 10^{-6}$  | $0.35 \times 10^{-6}$ | 7.75851  | $5.4 \times 10^{-8}$  | $(1.98 \times 10^{-6}) - (3.41 \times 10^{-6})$ |

For the linear fit, Student's test statistic reject the null hypothesis (intercept = 0) and hence, at 95 % confidence limit, the fitted intercept is significantly different from zero. Also, the confidence limit interval for the intercept does not include the zero value, reinforcing the idea of a non-zero intercept. In the case of the quadratic fit, Student's test statistic accept the null hypothesis, and therefore, at the 95 % confidence limit the intercept is NOT significantly different from zero.

These results suggest that the quadratic model should give a better fit to the data than the linear model. The ANOVA-LOF test, indicate that only the quadratic model do not give significant evidence of lack of fit at 95 % confidence limit. Hence, according to this criterion, the linear model can be disregarded.

|                      | DF | Sum of squares          | Mean square             | F value | Prob>F                 |
|----------------------|----|-------------------------|-------------------------|---------|------------------------|
| <u>Linear fit</u>    |    |                         |                         |         |                        |
| Lack of fit          | 7  | $1.2496 \times 10^{-4}$ | $1.785 \times 10^{-5}$  | 8.3361  | $1.408 \times 10^{-4}$ |
| Pure error           | 18 | $3.8546 \times 10^{-5}$ | $2.1414 \times 10^{-6}$ |         |                        |
| Error                | 25 | $1.635 \times 10^{-4}$  |                         |         |                        |
| <u>Quadratic fit</u> |    |                         |                         |         |                        |
| Lack of fit          | 6  | $8.0618 \times 10^{-6}$ | $1.3436 \times 10^{-6}$ | 0.62744 | 0.70647                |
| Pure error           | 18 | $3.8546 \times 10^{-5}$ | $2.1414 \times 10^{-6}$ |         |                        |
| Error                | 24 | $4.6608 \times 10^{-5}$ |                         |         |                        |

Additional support was obtained using the other criteria: Akaike's Information Criterion Test (AIC), Bayesian Information Criterion Test (BIC), and Mandel's test (F-test).

#### AIC Test

|                 | RSS                      | N  | Params | AIC        | Akaike Weight          |
|-----------------|--------------------------|----|--------|------------|------------------------|
| Linear model    | $1.63504 \times 10^{-4}$ | 27 | 2      | -317.34822 | $1.754 \times 10^{-7}$ |
| Quadratic model | $4.66076 \times 10^{-5}$ | 27 | 3      | -348.46058 | 1                      |

#### BIC Test

|                 | RSS                      | N  | Params | BIC       | Diff BIC |
|-----------------|--------------------------|----|--------|-----------|----------|
| Linear model    | $1.63504 \times 10^{-4}$ | 27 | 2      | -314.5402 | 30.59122 |
| Quadratic model | $4.66076 \times 10^{-5}$ | 27 | 3      | -345.0954 | 0        |

#### F-test

| F        | Numer.DF | Denom.DF | Prob > F               |
|----------|----------|----------|------------------------|
| 60.19454 | 1        | 24       | $5.406 \times 10^{-8}$ |

At 95 % confidence level, the three tests indicate that the quadratic model is more likely to be correct than the linear model.

## S8. Analytical calibration plot in the presence of Pb-CRM (recovery assay)

The inverse addition standard method was employed in order to obtain the recovery directly from the Y-axis. Linear and quadratic fits to the data yield the following parameters:

|                      | Value      | Standard error | t-value   | P >  t                   | 95 % confidence range        |
|----------------------|------------|----------------|-----------|--------------------------|------------------------------|
| <u>Linear fit</u>    |            |                |           |                          |                              |
| Intercept            | -43.47491  | 3.14187        | -13.83726 | $8.16986 \times 10^{-4}$ | (-53.47376) – (-33.47606)    |
| Slope                | 1190.83467 | 35.55057       | 33.49692  | $5.84877 \times 10^{-5}$ | (1077.69679) – (1303.97255)  |
| <u>Quadratic fit</u> |            |                |           |                          |                              |
| Intercept            | -53.413    | 6.63174        | -8.05415  | 0.01507                  | (-81.94706) – (-24.87893)    |
| Linear term          | 1480.34446 | 180.86437      | 8.18483   | 0.0146                   | (702.14787) – (2258.54105)   |
| Quadratic term       | 1480.34446 | 1125.08105     | -1.62113  | 0.24644                  | (-6664.73545) – (3016.93068) |

The ANOVA-LOF test, indicate that the quadratic model do not give significant evidence of lack of fit at 95 % confidence limit. Hence, according to this criterion, the linear model can be disregarded.

|                      | DF | Sum of squares | Mean square | F value    | Prob>F                   |
|----------------------|----|----------------|-------------|------------|--------------------------|
| <u>Linear fit</u>    |    |                |             |            |                          |
| Lack of fit          | 1  | 5904.21395     | 5904.21395  | 1122.04379 | $5.84877 \times 10^{-5}$ |
| Pure error           | 3  | 15.78605       | 5.2620      |            |                          |
| Error                | 4  | 5920           |             |            |                          |
| <u>Quadratic fit</u> |    |                |             |            |                          |
| Lack of fit          | 2  | 5913.17812     | 2956.58906  | 866.79535  | 0.00115                  |
| Pure error           | 2  | 6.82188        | 3.41094     |            |                          |
| Error                | 4  | 5920           |             |            |                          |

The quadratic model is chosen for this analysis, and as a consequence, the  $Pb_{\text{solution}}$  concentration is  $53.4 \pm 6.6 \mu\text{g/L}$ .

## S9. SWASV and FTIR analyses of paint chip samples

### S9.1. Details of Case I

The electrochemical analysis (dilution 1/10) shows the

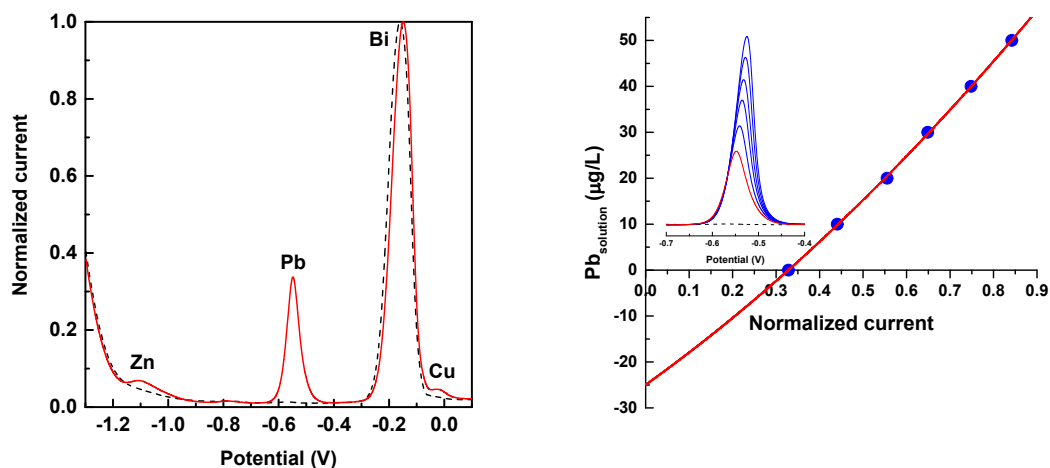

presence of Pb, along with Zn and Cu.

The standard addition method yielded a quadratic curve that represents a better fit than the straight line (BIC and F-Test criteria, AIC criterium favours the straight line curve). The axes were interchanged in order to obtain the Pb<sub>solution</sub> directly from the graph, as well as the 95 % confidence interval.

Pb<sub>solution</sub> = 25 µg/L

(19 µg/L – 30 µg/L, 95 % confidence interval)

Pb<sub>sample</sub> = 30,000 mg/kg

(23,000 mg/kg – 36,000 mg/kg, 95 % confidence interval)

FTIR analysis confirm the presence of chrome yellow (PbCrO<sub>4</sub>) as pigment, and linseed oil as binder.

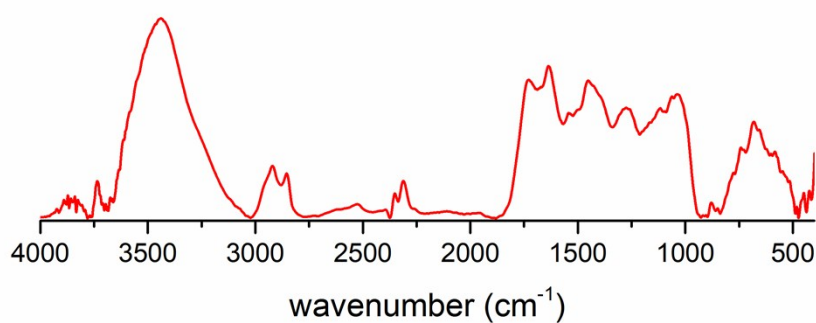

| Crome yellow (cm <sup>-1</sup> ) | Linseed oil (cm <sup>-1</sup> ) | Experimental (cm <sup>-1</sup> ) | Assignment                       |
|----------------------------------|---------------------------------|----------------------------------|----------------------------------|
|                                  | 459 <i>w</i>                    | 448 <i>w</i>                     | Linseed oil                      |
| 595 <i>s</i>                     | 581 <i>m</i>                    | 580 <i>sh</i>                    | Linseed oil                      |
| 627 <i>s</i>                     |                                 | 649 <i>s</i>                     | PbCrO <sub>4</sub>               |
|                                  |                                 | 677 <i>s</i>                     | ?                                |
|                                  | 721 <i>s</i>                    | 730 <i>w</i>                     | Linseed oil                      |
| 853 <i>s</i>                     |                                 | 848 <i>w</i>                     | PbCrO <sub>4</sub>               |
| 967 <i>w</i>                     |                                 |                                  |                                  |
| 1040 <i>s</i>                    |                                 | 1033 <i>s</i>                    | PbCrO <sub>4</sub>               |
|                                  | 1098 <i>m</i>                   |                                  |                                  |
| 1173 <i>sh</i>                   | 1160 <i>s</i>                   | 1121 <i>s</i>                    | PbCrO <sub>4</sub> + Linseed oil |
|                                  | 1237 <i>m</i>                   |                                  |                                  |
|                                  |                                 | 1270 <i>s</i>                    | ?                                |
|                                  | 1461 <i>m</i>                   | 1453 <i>s</i>                    | Linseed oil                      |
|                                  | 1655 <i>w</i>                   | 1634 <i>s</i>                    | Linseed oil                      |
|                                  | 1742 <i>s</i>                   | 1733 <i>s</i>                    | Linseed oil                      |
|                                  | 2853 <i>s</i>                   | 2853 <i>m</i>                    | Linseed oil                      |
|                                  | 2923 <i>s</i>                   | 2922 <i>m</i>                    | Linseed oil                      |
|                                  | 3010 <i>m</i>                   |                                  |                                  |
|                                  |                                 | 3440 <i>s</i>                    |                                  |

### S9.2. Details of Case II

The electrochemical analysis (1/100 dilution) confirms the presence of Pb as well as Zn.

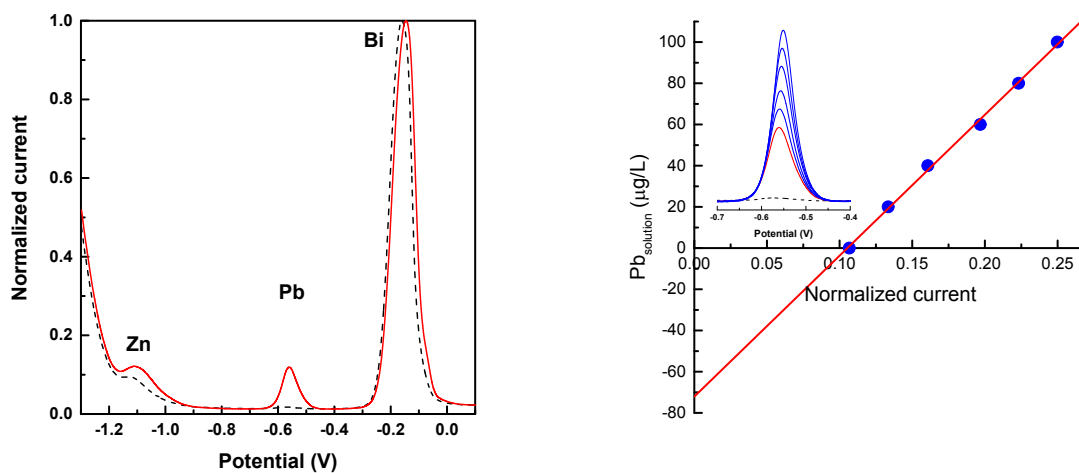

The standard addition method yielded a straight line that represents a better fit than the quadratic curve (supported by AIC and F-Test criteria, while BIC criteria was not conclusive). The axes were interchanged in order to obtain the Pb<sub>solution</sub> directly from the graph, as well as the 95 % confidence interval.

Pb<sub>solution</sub> = 72 µg/L

(64 µg/L – 80 µg/L, 95 % confidence interval)

Pb<sub>sample</sub> = 90,000 mg/kg

(80,000 mg/kg – 100,000 mg/kg, 95 % confidence interval)

FTIR analysis confirm the presence of lead white (2PbCO<sub>3</sub>·Pb(OH)<sub>2</sub>) as pigment, and gypsum (CaSO<sub>4</sub>·2H<sub>2</sub>O) as filler.

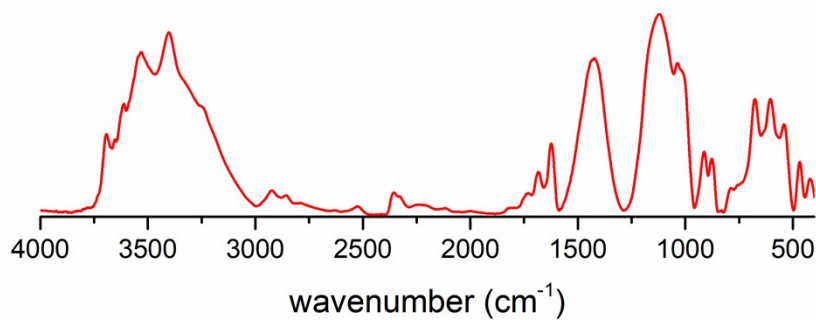



| Lead white (cm <sup>-1</sup> ) | Gypsum (cm <sup>-1</sup> ) | Experimental (cm <sup>-1</sup> ) | Assignment                              |
|--------------------------------|----------------------------|----------------------------------|-----------------------------------------|
|                                | 418 <i>m</i>               | 418 <i>m</i>                     | CaSO <sub>4</sub> ·2H <sub>2</sub> O    |
|                                | 460 <i>m</i>               | 468 <i>m</i>                     | CaSO <sub>4</sub> ·2H <sub>2</sub> O    |
|                                |                            | 541 <i>m</i>                     | ?                                       |
|                                | 596 <i>s</i>               | 604 <i>s</i>                     | CaSO <sub>4</sub> ·2H <sub>2</sub> O    |
|                                | 667 <i>s</i>               |                                  |                                         |
| 678 <i>s</i>                   |                            | 676 <i>s</i>                     | 2PbCO <sub>3</sub> ·Pb(OH) <sub>2</sub> |
| 691 <i>sh</i>                  |                            |                                  |                                         |
|                                | 729 <i>w</i>               |                                  |                                         |
| 762 <i>m</i>                   |                            |                                  |                                         |
| 833 <i>w</i>                   |                            |                                  |                                         |
| 853 <i>w</i>                   |                            |                                  |                                         |
|                                | 879 <i>m</i>               | 876 <i>m</i>                     | CaSO <sub>4</sub> ·2H <sub>2</sub> O    |
| 891 <i>w</i>                   |                            |                                  |                                         |
|                                | 1005 <i>sh</i>             | 1003 <i>m</i>                    | CaSO <sub>4</sub> ·2H <sub>2</sub> O    |
| 1045 <i>s</i>                  |                            | 1035 <i>s</i>                    | 2PbCO <sub>3</sub> ·Pb(OH) <sub>2</sub> |
|                                | 1108 <i>s</i>              | 1121 <i>s</i>                    | CaSO <sub>4</sub> ·2H <sub>2</sub> O    |
| 1364 <i>sh</i>                 |                            |                                  |                                         |
| 1397 <i>s</i>                  |                            | 1424 <i>s</i>                    | 2PbCO <sub>3</sub> ·Pb(OH) <sub>2</sub> |
|                                | 1445 <i>m</i>              |                                  |                                         |
| 1541 <i>sh</i>                 |                            |                                  |                                         |
|                                | 1620 <i>s</i>              | 1623 <i>m</i>                    | CaSO <sub>4</sub> ·2H <sub>2</sub> O    |
|                                | 1683 <i>m</i>              | 1683 <i>m</i>                    | CaSO <sub>4</sub> ·2H <sub>2</sub> O    |
| 1729 <i>m</i>                  |                            | 1735 <i>w</i>                    | 2PbCO <sub>3</sub> ·Pb(OH) <sub>2</sub> |
|                                | 2324 <i>w</i>              | 2325 <i>w</i>                    | CaSO <sub>4</sub> ·2H <sub>2</sub> O    |
| 2849 <i>w</i>                  |                            | 2858 <i>w</i>                    | 2PbCO <sub>3</sub> ·Pb(OH) <sub>2</sub> |
| 2916 <i>w</i>                  |                            | 2926 <i>w</i>                    | 2PbCO <sub>3</sub> ·Pb(OH) <sub>2</sub> |
|                                | 3242 <i>w</i>              | 3244 <i>sh</i>                   | CaSO <sub>4</sub> ·2H <sub>2</sub> O    |
|                                | 3402 <i>s</i>              | 3401 <i>s</i>                    | CaSO <sub>4</sub> ·2H <sub>2</sub> O    |
|                                | 3526 <i>s</i>              |                                  |                                         |
| 3534 <i>s</i>                  |                            | 3534 <i>s</i>                    | 2PbCO <sub>3</sub> ·Pb(OH) <sub>2</sub> |

Relative strength of signals are *w* = weak, *m* = medium, *s* = strong; *sh* = shoulder.

### S9.3. Details of Case III

The DWM gave negative results for Pb. The electrochemical analysis gave a minor signal that was processed by the standard addition method, with axis swapping. The  $Pb_{\text{solution}}$  extrapolated was  $3.6 \mu\text{g/L} < \text{LOD} = 14 \mu\text{g/L}$ . Hence, for the experimental data used in the analysis ( $m_{\text{sample}} = 0.396 \text{ g}$  and  $V_{\text{aliquot}} = 500 \mu\text{L}$ ) the lead content in the sample is  $Pb_{\text{sample}} < 35 \text{ mg/kg}$

FTIR analysis shows the presence of carbonate salts, none based on lead, along with linseed oil.

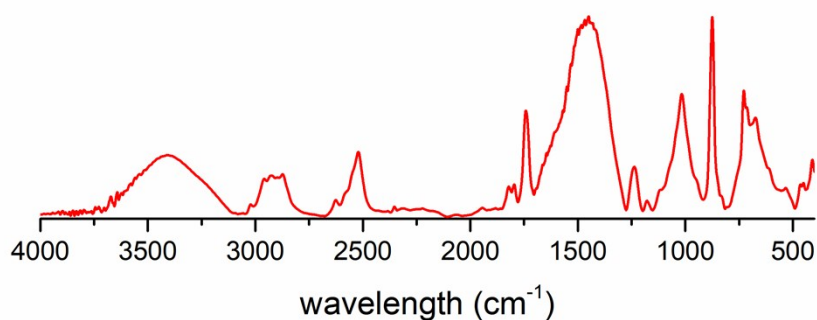

| $\text{CaMg}(\text{CO}_3)_2$ ( $\text{cm}^{-1}$ ) | Linseed oil ( $\text{cm}^{-1}$ ) | Experimental ( $\text{cm}^{-1}$ ) | Assignment                                 |
|---------------------------------------------------|----------------------------------|-----------------------------------|--------------------------------------------|
|                                                   | 459 <i>w</i>                     | 465 <i>w</i>                      | Linseed oil                                |
|                                                   | 581 <i>m</i>                     |                                   |                                            |
|                                                   | 721 <i>s</i>                     | 720 <i>s</i>                      | Linseed oil                                |
| 726 <i>s</i>                                      |                                  | 727 <i>s</i>                      | $\text{CaMg}(\text{CO}_3)_2$               |
| 878 <i>vs</i>                                     |                                  | 876 <i>s</i>                      | $\text{CaMg}(\text{CO}_3)_2$               |
|                                                   | 1098 <i>m</i>                    | 1117 <i>sh</i>                    | Linseed oil                                |
|                                                   | 1160 <i>s</i>                    |                                   |                                            |
|                                                   | 1237 <i>m</i>                    | 1236 <i>m</i>                     | Linseed oil                                |
| 1431 <i>vs</i>                                    | 1461 <i>m</i>                    | 1450 <i>s</i>                     | $\text{CaMg}(\text{CO}_3)_2$ + Linseed oil |
|                                                   | 1742 <i>s</i>                    | 1741 <i>s</i>                     | Linseed oil                                |
|                                                   | 2853 <i>s</i>                    | 2874 <i>m</i>                     | Linseed oil                                |
|                                                   | 2923 <i>s</i>                    | 2926 <i>m</i>                     | Linseed oil                                |
|                                                   | 3010 <i>m</i>                    | 3021 <i>w</i>                     | Linseed oil                                |
|                                                   |                                  | 3406 <i>s</i>                     |                                            |

Relative strength of signals are *w* = weak, *m* = medium, *s* = strong; *vs* = very strong; *sh* = shoulder.
